# Supplementary material for: Branched Ag nanoplates: synthesis dictated by suppressing surface diffusion and catalytic activity for nitrophenol reduction
Source: Royal Society of Chemistry journal article supplement (doi:10.1039/c7ce01421j), 2017-01-01
Supplement: c7ce01421j1.pdf [file c7ce01421j1.pdf]

## **Branched Ag Nanoplates: Synthesis Dictated by Suppressing Surface Diffusion and Catalytic Activity for Nitrophenol Reduction**

Taixing Tan,<sup>a, c</sup> Shun Zhang<sup>b</sup> and Cheng Wang<sup>\*b</sup>

<sup>a</sup> State Key Laboratory of Rare Earth Resource Utilization, Changchun Institute of Applied Chemistry, Chinese Academy of Sciences, Changchun, P. R. China.

<sup>b</sup> Institute for New-Energy Materials and Low-Carbon Technologies, School of Materials Science and Engineering, Tianjin University of Technology, Tianjin 300384, P. R. China. E-mail: [cwang@tjut.edu.cn](mailto:cwang@tjut.edu.cn)

<sup>c</sup> University of Chinese Academy of Sciences, Beijing 100049, P. R. China.

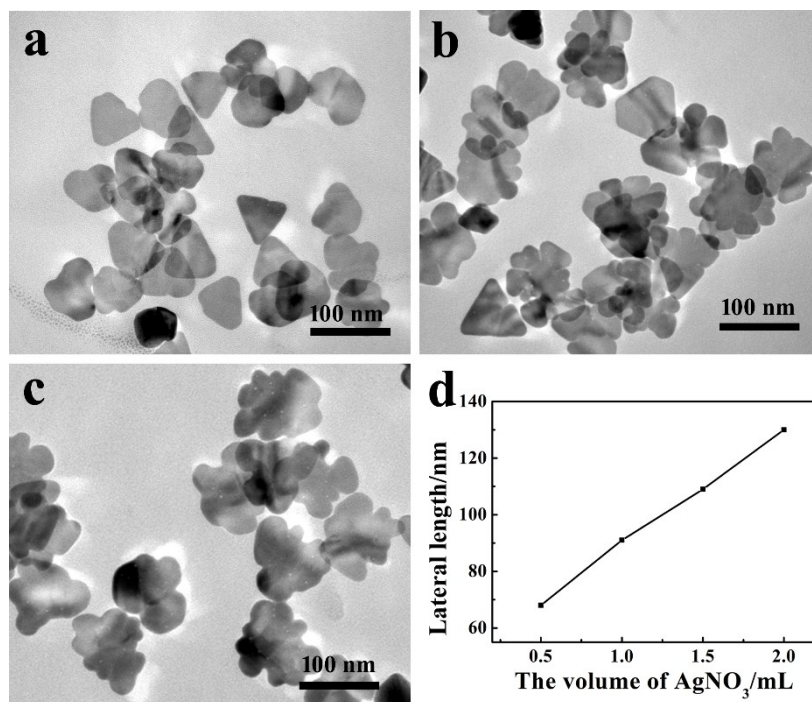

**Figure S1:** the TEM images of branched Ag nanoplates obtained with adding different amount of AgNO<sub>3</sub>: (a) 0.5mL, (b) 1.0mL, (c) 1.5mL. (d) The relationship between growth length and volume of AgNO<sub>3</sub>.

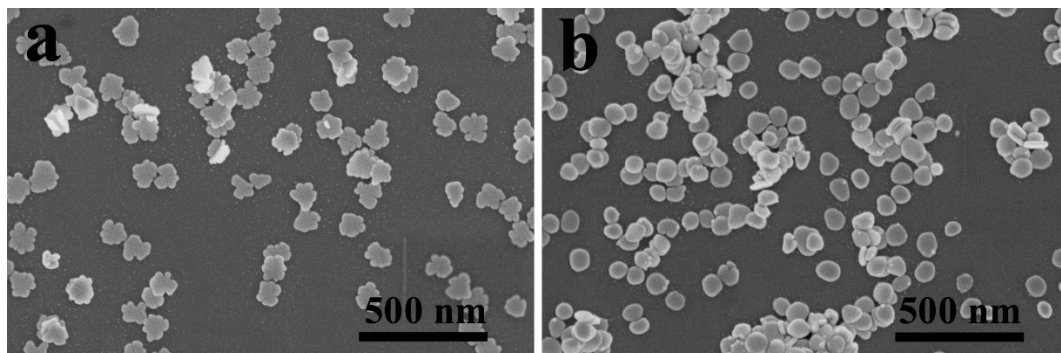

**Figure S2.** (a) Branched Ag nanoplates was obtained at 0°C without changing other conditions. (b) Round Ag nanoplates was produced in the absence of Cu(NO<sub>3</sub>)<sub>2</sub> and at 0°C.
